# Supplementary material for: Gamma-glutamyl transferase 5 overexpression in cerebrovascular endothelial cells improves brain pathology, cognition, and behavior in APP/PS1 mice
Source: PubMed Central journal article supplement — Neural Regen Res. 2024 Apr 16;20(2):533–47. doi: 10.4103/NRR.NRR-D-23-01525 (PMC11317949; doi:10.4103/nrr.nrr-d-23-01525), 2024-04-16
Supplement: NRR-20-533_Suppl1.pdf [file NRR-20-533_Suppl1.pdf]

**Additional Table 1. The differential genes identified in our *in vitro* experiments and those identified in the *in vivo* experiments conducted by Lau et al.**

| <b>AD-Endothelial</b>     | <b>A<math>\beta</math><sub>1-42</sub>-hCMEC/D3</b> |
|---------------------------|----------------------------------------------------|
| <b>Up-regulated genes</b> |                                                    |
| KCNIP4                    | RPS24                                              |
| FLT1                      | NUCKS1                                             |
| CLDN5                     | HMGN2                                              |
| SLC7A5                    | RPS27A                                             |
| MT2A                      | NAMPT                                              |
| SLCO4A1                   | RPS21                                              |
| LRRTM4                    | RPL9                                               |
| FGF14                     | MDM2                                               |
| RBFOX1                    | SPCS3                                              |
| CSMD1                     | OIP5-AS1                                           |
| VWF                       | U2SURP                                             |
| SLC16A1                   | E2F7                                               |
| ST6GALNAC3                | POGLUT3                                            |
| TMSB10                    | EDEM1                                              |
| ABCB1                     | SRSF2                                              |
| ITM2A                     | C6orf62                                            |
| PODXL                     | TMX3                                               |
| OPCML                     | NHLRC2                                             |
| TGM2                      | SPPL2A                                             |
| IFI27                     | LNPEP                                              |
| SLC7A1                    | MPHOSPH9                                           |
| ID1                       | DBI                                                |
| MT1E                      | CENPU                                              |
| KCNQ5                     | BRIP1                                              |
| SPOCK2                    | TMTC3                                              |
| PTPRD                     | GTF2A1                                             |
| CNTNAP2                   | SOAT1                                              |
| ROBO2                     | MTAP                                               |
| LIMCH1                    | MZT1                                               |
| DSCAM                     | CUL5                                               |
| EGFL7                     | PIGK                                               |
| MT1M                      | CCP110                                             |
| ATP10A                    | CRNDE                                              |
| ELOVL7                    | TMEM41B                                            |
| SLC9A3R2                  | LSM8                                               |
| NRG3                      | ORMDL1                                             |
| HERC2                     | CENPK                                              |
| LRRC4C                    | HNRNPH1                                            |
| NRXN1                     | UBE2E1                                             |
| PTPRB                     | TRIM59                                             |
| SNTG1                     |                                                    |

ERG  
DOCK9  
ARMC9  
FAM155A  
LRP1B  
ST8SIA6  
HLA-E  
KLF2  
ANO2  
KCND2  
ABCG2  
NEGR1  
NRXN3  
RAMP2  
RALYL  
ADGRL4  
CADM2  
ANKS1B  
SLC39A10  
LRRC7  
RPS28  
CD34  
MYRIP  
GRASP  
FAM19A2  
NKAIN2  
MFSD2A  
CSMD3  
AFDN  
SAMD12  
MECOM  
IQCJ-SCHIP1  
BST2  
IGF1R  
CCSER1  
SLC2A1  
LY6E  
NCAM2  
GRIK2  
IGFBP3  
CGNL1  
DPP10  
SOX18  
TM4SF1  
ID3  
NLGN1

RNASE1  
EEF1A1  
ICAM2  
CCDC85A  
GRM5  
GRM7  
AC092691.1  
HSPA1A  
NFIB  
EPHA4  
PHACTR1  
PDZRN4  
MT1X  
A2M  
DCC  
MDGA2  
SLC30A1  
PCDH15  
KHDRBS2  
ANKRD37  
CRIP2  
ITGA6  
TMEM132C  
CTNNA2  
SRARP  
DPP6  
CDH2  
PECAM1  
SPOCK3  
SORBS1  
SORBS2  
RGCC  
JCAD  
S100A10  
CAVIN1  
TPST2  
THSD7A  
TAGLN2  
KCTD8  
ADIPOR2  
STXBP5L  
CRIM1  
GALNT18  
RYS2  
ERC2  
BTNL9

PCDH9  
CXorf36  
RPL41  
RGS7  
WWTR1  
FGF12  
LINGO2  
ANXA3  
TIE1  
ANGPT2  
PCDH7  
NRG1  
TENM2  
LIMS2  
DLGAP1  
SYT1  
ALPL  
CYR1  
IFITM2  
CNTN5  
HYAL2  
PLEKHG1  
PTPRT  
TSPAN5  
RPS12  
SYNE1  
HS6ST3  
FAM19A1  
LHFPL3  
S1PR1  
MKL2  
PDXK  
RPS23  
SLC52A3  
RPL36  
TMEM123  
RASIP1  
TFRC  
SLC3A2  
SLC1A7  
TMEM132D  
CDH12  
RPS27  
NAV3  
ABLIM1  
AGBL4

KLF4  
CHRM3  
SHANK3  
UNC5D  
SLCO2B1  
PCAT19  
DEPP1  
NDRG1  
TOX  
FRMPD4  
SLC38A5  
RPS19  
MT-CYB  
NET1  
ENG  
SGCZ  
APOLD1  
KCTD16  
ARL15  
LSAMP  
FLI1  
RPS15A  
CAVIN2  
ACVRL1  
SGPP2  
DLL4  
GALNT15  
ARHGAP31  
STOM  
PLXNA2  
SCARB1  
ROBO4  
SERTAD1  
CDH18  
RIMS2  
ARPP21  
ADAM15  
ETS2  
HSPA1B  
CDYL2  
LRFN5  
DOCK3  
ANK3  
FOSL2  
SEMA6B  
GRIA2

HSPH1  
AC109466.1  
TPT1  
HEG1  
BSG  
SLC39A8  
TNR  
GRIA4  
HLA-B  
VIM  
ATRNL1  
GRB10  
ZNF366  
GRIA1  
IL32  
ST6GAL1  
SLC1A1  
MT1F  
TEK  
KIAA1217  
RPGR  
SEMA3F  
RPS27A  
HSP90AA1  
CNTNAP3B  
BACE2  
GPR85  
STOX2  
PIK3R3  
MTUS2  
MT-ATP6  
CADPS  
DNM3  
RPLP1  
KAZN  
NES  
GNAI2  
INSR  
NPIP5  
LRRTM3  
MT-ND3  
GALNT13  
CEMIP2  
STXBP6  
PON2  
TNXB

GALNTL6  
FLRT2  
CHSY1  
PPP2R2B  
CPD  
IL1RAPL1  
RAPGEF3  
CPNE8  
CCDC85B  
MGST2  
VSIR  
AIF1L  
ACTG1  
MT-ND4  
CNOT8  
ATP1A1  
TBC1D4  
TSC22D1  
BRINP3  
YES1  
DNAJB1  
RPL13  
CNTNAP5  
TM4SF18  
MAP3K11  
RPL10  
DLG2  
SMAD6  
THSD4  
SLC5A6  
MYCT1  
PTTG1IP  
MT-ND2  
PKN3  
KCTD12  
HMCN1  
LAMA5  
HECW1  
CDH5  
NELL2  
AFF3  
MYO10  
BCL6B  
36951.000  
RPL3  
PEX5L

LSR  
MCTP1  
MCL1  
PALMD  
ARFGEF3  
LRP8  
MIDN  
ACVR1  
SEC14L1  
MMRN2  
OOEP  
ATP8A2  
IMPDH1  
TXNRD1  
RPL35  
SLC19A3  
B2M  
RGS3  
EMCN  
THRB  
STARD4  
TSHZ2  
VAMP5  
HCN1  
CNOT6L  
RASGRP3  
S100A16  
RPL28  
ADGRL2  
MYT1L  
NCAM1  
OLFM3  
SEMA6A  
FMNL2  
RPL13A  
LAMA3  
CNKSR3  
HSP90AB1  
SLC24A2  
CDH10  
RASGRF2  
TMEM178B  
NOVA2  
OCLN  
LMBR1  
CACNA1B



PTMA  
DNAJA1  
RPS3  
PTPRM  
AC006148.1  
MGAT1  
JAG2  
NRCAM  
FAM110D  
TMSB4X  
ACSL5  
RPL21  
NPAS2  
SOCS3  
KIAA1549  
SHC2  
AMBRA1  
BMPR2  
CCNY  
RPS14  
CD320  
RPS18  
TCN2  
RNF144B  
MCF2L  
RIMS1  
SDCBP  
EPAS1  
IFITM3  
SLC4A10  
PDE1A  
FOXF1  
SERPINH1  
MFHAS1  
KIRREL3  
GRIN2A  
ADGRF5  
DEGS2  
CHL1  
RUNDC3B  
CTNND2  
PPA1  
FRMD5  
FXVD5  
CA10  
PRX

RPL35A  
CDH13  
IL3RA  
CP  
NEDD9  
ST6GALNAC5  
APOO  
RIMKLB  
SLC35F3  
ADGRG1  
NOS3  
FLNB  
TMCC3  
RPL34  
RPL8  
ESAM  
DCLK1  
TMEFF2  
NALCN  
CCDC69  
LDLR  
FAM107A  
GRIA3  
NRP1  
SHE  
SEZ6L  
MT-ND1  
MIR137HG  
PKP4  
CNKSR2  
CNTN3  
RHOC  
RPS5  
DGKI  
CTGF  
EFNA1  
DUSP1  
VCAN  
MT-CO2  
GFOD1  
AC018816.1  
PPFIBP1  
CLEC14A  
SERF2  
LMO2  
FAM167B

PDE10A  
SERPINB6  
SHISA9  
ANKS1A  
RPL7A  
RPS11  
ASIC2  
RASSF3  
CTNNB1  
SCN3A  
FAT3  
GPR146  
CMTM8  
RAC1  
APP  
RPL27  
NFKBIA  
HIP1R  
EPHA6  
TANC1  
NOTCH4  
ZNF804B  
SPTAN1  
FZD4  
FKBP4  
GALNT17  
EFR3B  
KCNH7  
SLC35F1  
RPL15  
KIF1C  
EXT1  
PRKCH  
RPL38  
ERBB4  
RPL29  
ZNF521  
AP3S1  
PINK1  
SH3GL2  
SKIL  
HERPUD1  
MT-CO3  
RBMS2  
GATA2  
NOVA1

HECW2  
AHNAK  
SLC47A1  
EPHB4  
SMAD9  
PCLO  
RIN2  
R3HDM1  
CPNE4  
EDN1  
SYN3  
FGR  
CYTH1  
ITGA2  
ZFPM2  
RPL11  
IFI6  
ASTN1  
CSMD2  
CACNA1A  
GABRB3  
HSPA12B  
PPP3CA  
SMARCA2  
LEPR  
MFAP3  
TMEM232  
ATOH8  
ESYT2  
CDH8  
CCDC50  
BAIAP2L1  
UNC79  
LRRC32  
EXOC6  
SET  
CARHSP1  
RNF19B  
ITPR3  
XKR4  
MT1A  
GUK1  
MIR181A1HG  
ITGB1  
MACROD2  
AGFG1

MT-ND5  
PRELID2  
PXN  
RPS4X  
EEF1D  
GRIN2B  
SMG1  
PDGFC  
MSRA  
TEAD4  
CTTNBP2NL  
RAPGEF2  
FAT4  
ESRRG  
SH3BP4  
MICAL3  
RPS29  
DAPK1  
HLA-A  
NTNG1  
PRKD2  
MAPK11  
ARHGEF3  
NLK  
PLLP  
SNU13  
FMNL3  
TMEM87B  
STIP1  
CSDE1  
PTP4A3  
RPL6  
VAT1  
ARPC1B  
CBLN2  
FES  
UBB  
LINC01122  
TENM3  
ANKRD30BL  
SAT1  
CHIC2  
GIMAP6  
EMP2  
IRAK3  
SLC38A3

PAQR5  
CADPS2  
ARHGEF28  
DUSP23  
MYL12B  
SRGN  
SCN1A  
RPS2  
MRPL1  
TMEM50B  
BMS1P14  
HLA-C  
UBA52  
UBC  
RIPOR1  
EIF1  
SOS1  
STEAP1B  
PPP1R16B  
PLA1A  
NLGN4X  
COBL  
EFCAB14  
SGK1  
COX7A1  
USP6NL  
ANK2  
STXBP5-AS1  
GSE1  
MAMDC2  
ARL4A  
GRIK1  
CLIC2  
DSTN  
RPLP0  
RPS20  
MYO1E  
RPL32  
STX3  
GRIP1  
IL6ST  
ADGRB3  
KSR2  
BCAP31  
CACYBP  
SNRPD2

WWC2  
ST3GAL1  
NELL1  
HSPA8  
PDGFB  
TGOLN2  
SPOCK1  
TRIM9  
ATOX1  
37681.000  
USP54  
IVNS1ABP  
PTPN14  
PAK5  
RPS7  
PTPRN2  
CDA  
TPM3  
CLEC2B  
DUSP6  
ITGA5  
GABRB1  
TRGC2  
PPARG  
IER2  
FSTL4  
FZD6  
PEA15  
FGD5  
SNED1  
RPS19BP1  
NECTIN2  
SAMM50  
TCF15  
RBFOX3  
LINC00599  
RPS16  
FSTL5  
KHDRBS3  
DLGAP2  
ICA1  
CYR61  
GIMAP7  
GABRG3  
RPS15  
RPS6

RAB13  
HOMER1  
SEMA3B  
CENPB  
PLEC  
SULF2  
SH3BGRL2  
PCSK2  
KLHL2  
SH2D3C  
MX1  
RPS13  
LINC01322  
KIAA1549L  
MIR222HG  
GBP4  
SLC25A29  
HSPB1  
C4orf3  
SOX7  
SYNGR2  
HOPX  
PERP  
SLC31A1  
NR4A1  
CDC37  
CASP10  
AK5  
KAT2B  
ANXA1  
SMCO4  
SELENOW  
EIF4G2  
PIZO1  
KCNC2  
ARAP3  
CLIC5  
BHLHE40  
TINAGL1  
ATP8A1  
UPP1  
PIK3C2A  
MKNK2  
DSP  
ORAI1  
TMTC2



CAPNS1  
CLEC1A  
RPL30  
TRHDE  
S100A13  
FOXC1  
WARS  
ATP7B  
MGAT4C  
SGCD  
F11R  
FUT9  
RPS9  
AMFR  
MID1  
CLIC1  
EPHA3  
ADAMTS6  
RFC3  
MEF2A  
NOD1  
ZKSCAN1  
VWA1  
SSFA2  
PGM5  
JAM2  
GIMAP4  
RPS8  
ASTN2  
SHROOM1  
AC002070.1  
XYLT1  
APOL3  
LGALS3  
CLSTN2  
RPL10A  
TMED10  
CHST12  
SHROOM4  
C22orf34  
SLCO1A2  
LSS  
HYAL1  
B4GALT1  
EFNB2  
MYL6

FEZ2  
VEZT  
MT1G  
AHSA1  
PPM1F  
GRM1  
JUN  
CELF2  
CCNI  
PNP  
ELOB  
CYLD  
SORCS3  
SCN2A  
PPARD  
DCHS1  
STAU2  
PPFIA2  
DBN1  
SLC44A5  
SNAP91  
FGD6  
TENM4  
RPL7  
RPS6KA3  
NDST1  
LITAF  
GDAP1  
HSPA4  
MSX1  
ENAH  
GNG5  
MT-ND4L  
AGPAT4  
KIAA1211L  
RAPGEF1  
P4HB  
ADD1  
MYL12A  
DPY19L1  
TRIR  
SRSF9  
NAMPT  
COL19A1  
INPP5D  
OSBPL10

TUBA1C  
MLEC  
ZNF385D  
TCOF1  
AL138686.1  
MEG8  
KIF5B  
KLHL5  
PTPRO  
MIER2  
GCH1  
C12orf57  
RACK1  
KCNB2  
PICALM  
PIP5K1C  
IL1RAPL2  
CASKIN2  
TRIM56  
FLT4  
SESTD1  
IL4R  
TPM4  
SLCO3A1  
CERK  
CADM1  
YBX1  
ME3  
SPOP  
RFX3  
GPR35  
MTRF1L  
LUZP1  
C1orf56  
DEDD2  
CCDC68  
UBE2H  
NEK5  
AKAP6  
TSTA3  
SLC8A1  
KCNQ2  
G3BP1  
C2orf83  
BCL3  
PLAT

**Down-regulated genes**

|            |         |
|------------|---------|
| FTX        | FLNA    |
| NEAT1      | MT-ND5  |
| ZBTB20     | MYH9    |
| TJP1       | LAMA5   |
| MKLN1      | AGRN    |
| UTRN       | TLN1    |
| MALAT1     | FLNB    |
| PTPRK      | PLXNB2  |
| PTN        | MYO1C   |
| KIAA1109   | TAGLN2  |
| SLC12A2    | PKN1    |
| SLC12A7    | ACADVL  |
| PLCB4      | DNM2    |
| HBB        | EPAS1   |
| LHFPL6     | SMARCA4 |
| AGRN       | LAMB2   |
| BPMS       | HSPG2   |
| PDE8A      | PTPRF   |
| PRELP      | TYK2    |
| ISYNA1     | COL1A1  |
| CPE        | LOXL2   |
| DISC1      | TMEM259 |
| NOTCH3     | LRP1    |
| RORA       | FKBP10  |
| DCN        | TLE5    |
| PARD3      | PLXNA1  |
| PLXDC1     | UBE2S   |
| CACNA1C    | MINK1   |
| FRMD3      | HTRA1   |
| RIPOR3     | EFEMP1  |
| LPP        | TTYH3   |
| CALD1      | ITPR3   |
| SH3RF1     | MYO9B   |
| ARHGAP42   | PLOD1   |
| ATP1A2     | CDC37   |
| EBF1       | KMT2D   |
| PTEN       | CNN2    |
| ARHGAP6    | LRP10   |
| ZFHX3      | KIF1C   |
| MYO1B      | PTK7    |
| CASC15     | ANKRD52 |
| CARMN      | MYL6    |
| TRPC3      | SUN2    |
| AC092957.1 | SLC16A3 |
| SLC19A1    | FBN2    |

|            |         |
|------------|---------|
| GRAMD2B    | TCF3    |
| TFPI       | CHD3    |
| SLC6A13    | INPPL1  |
| CLMN       | OGDH    |
| SLC1A3     | MAP7D1  |
| PTH1R      | HK1     |
| GRM3       | TECR    |
| MAML2      | NBEAL2  |
| PDGFRB     | CCN1    |
| CACHD1     | FLOT2   |
| RNF152     | RABL6   |
| P2RY14     | TM9SF4  |
| SLC30A10   | BMP1    |
| AL138828.1 | NECTIN2 |
| AC012409.2 | CIZ1    |
| CPM        | PDLIM1  |
| ADGRD1     | PELP1   |
| UST        | GIPC1   |
| HES4       | DUSP1   |
| CDH6       | SYDE1   |
| GRM8       | SEMA6B  |
| PRKG1      | CABIN1  |
| SLC6A12    | MEGF8   |
| PLCE1      | MCAM    |
| ARHGAP10   | RAI1    |
| SLC6A1     | FADS3   |
| SNTB1      | CIC     |
| GPC5       | MAST2   |
| SLC38A11   | SUPT5H  |
| ABCC9      | ARHGEF1 |
| NR2F2-AS1  | PCNX3   |
| DLC1       | MOGS    |
| KCNE4      | FOSL2   |
| EPS8       | TBC1D16 |
| COLEC12    | RUVBL2  |
| LAMA2      | FARSA   |
| PDE3A      | PIN1    |
| PAG1       | GTPBP1  |
| SLC6A1-AS1 | TRAF7   |
| PCBP3      | MAN2A2  |
| SGIP1      | PLXNA2  |
| PDE7B      | USP5    |
| TRPC4      | CCN2    |
| APOD       | EFHD2   |
| BCL2       | SCAP    |
| SLC20A2    | MRC2    |

|             |                |
|-------------|----------------|
| C11orf96    | SDC3           |
| GFAP        | XAB2           |
| PID1        | PGGHG          |
| TBX2        | TCIRG1         |
| SEMA5A      | RIPOR1         |
| RORB        | FSTL3          |
| RGL3        | LZTS2          |
| COL6A2      | BCAM           |
| BTBD9       | KIAA1522       |
| INPP4B      | KIFC3          |
| YBX3        | ABCA2          |
| ZEB1        | ARHGEF17       |
| KCNT2       | SLC35B2        |
| CYTH3       | GIT1           |
| COL6A1      | HDAC6          |
| RHOJ        | SLC2A1         |
| LZTS1       | WDR5           |
| ITIH5       | ABCA3          |
| GLUL        | ZDHHC8         |
| PTPRZ1      | CALCOCO1       |
| ACSS3       | EPHB4          |
| ANKRD44     | BCKDK          |
| ADAMTS9-AS2 | ASMTL          |
| GJC1        | SH2B1          |
| MFGE8       | ILVBL          |
| HBA2        | VPS26B         |
| COL4A3      | TFE3           |
| COL4A4      | GGT5           |
| RBMS3       | SLC66A2        |
| SLC6A17     | SETD1A         |
| COL5A3      | PALM           |
| MTURN       | INF2           |
| GPX3        | CEP170B        |
| PDE5A       | IRS1           |
| MSC-AS1     | RNF220         |
| NBEAL1      | MAFK           |
| RBMS1       | CELSR2         |
| MIR99AHG    | CDIPT          |
| AC016831.7  | AMPD2          |
| MRC2        | BAIAP2         |
| GPC6        | LYPLA2         |
| CERS6       | UCKL1          |
| SIK2        | CHR_HG30_PATCH |
| ZIC1        | DNMT3A         |
| SMOC2       | SLC12A9        |
| ATP1B2      | RUNX3          |

DAAM2  
PTPN13  
RAPH1  
NID1  
SNRK  
LINC00882  
CYSLTR2  
AXL  
CNTLN  
CECR2  
ABCA5  
CTNNA3  
RFTN1  
BNIP3L  
ABCA8  
AC022414.1  
PLXDC2  
GGT5  
NR2F1  
TTN  
BCL6  
AC002546.1  
NCOA2  
COL4A2  
TXNIP  
LTBP1  
CDK14  
FRY  
ENPEP  
FARP1  
MIR4435-2HG  
PARD3B  
DENND2A  
WLS  
RNMT  
TBX15  
CRISPLD2  
FAM13A  
EPB41L3  
ARHGEF7  
KSR1  
TRIQQ  
ATP1B3  
CD74  
MCC  
ITGA7

TRPM4

N4BP2L2  
ARHGAP17  
MAP2K6  
TCF7L1  
FRMD6  
ARHGEF17  
SSBP2  
BMP2K  
HCN2  
DNAH11  
ADAMTS10  
NRGN  
UTY  
GHR  
RBMX  
AKAP13  
CEBPD  
RNF180  
FKBP5  
ARHGEF12  
PTGDR2  
ERCC6L2  
SUMF1  
JUNB  
TTY14  
GCLC  
APOE  
GADD45G  
FBXL5  
ITSN1  
COL4A1  
ANAPC1  
GABRE  
COMMD1  
SLC17A7  
FERMT2  
CIRBP  
KLHL36  
MTREX  
PLCL1  
FAM110B  
ADAMTS9  
USP9Y  
NTRK3  
DIO3OS  
PDE1C



PRKN  
SLC38A2  
IGFBP7  
CCDC102B  
AC007364.1  
TAOK3  
RNLS  
MPPED2  
AL645608.8  
HEY2  
LAMC3  
NDRG2  
PTPN9  
VMP1  
SASH1  
TESC  
KLF9  
XRN1  
EDNRA  
GBE1  
SH3BGRL  
RUNX1T1  
ATP5MC3  
SOX5  
TBC1D2B  
SRSF2  
USP13  
CBLB  
ITPR2  
NF1  
FOXP2  
NT5DC2  
SCLT1  
C20orf27  
NR2F1-AS1  
GUCY1B1  
KIAA1328  
SLC7A11  
JAM3  
PIP5K1B  
COL24A1  
RGS4  
PLEKHG3  
CAMK2D  
PEAR1  
RAB28

SPECC1  
C4orf48  
SLCO1C1  
SIPA1L2  
ST5  
SCMH1  
AC007319.1  
DUBR  
CHCHD10  
PLOD1  
RASSF4  
TET2  
TSC22D2  
CYBA  
SLC25A36  
PPCDC  
DGKB  
ASAH1  
FILIP1L  
SORL1  
GJA4  
PPP3CB  
PHF21A  
OSMR-AS1  
NEK1  
RHOB  
PHLDB2  
AC098829.1  
BTAF1  
PEBP1  
CDKN1C  
WDR41  
TBX18  
PDE2A  
S1PR3  
ATF7IP  
C1QTNF1  
DST  
CYP7B1  
IL1R1  
TOP1  
ADAM33  
C2CD2  
CREBZF  
RCAN2  
SNX25

FSTL1  
KITLG  
LIN7A  
SENP6  
CRYBG3  
PRR16  
CD9  
NCDN  
CTDSPL  
EYA1  
CSF1R  
INVS  
ADARB2  
NDUFA4L2  
LENG8  
PITPNC1  
BACH1  
SLC38A6  
LCAT  
CA2  
AC104389.4  
DPYSL2  
GRK5  
DOCK5  
PCSK1N  
C1R  
BMPR1B  
SH3D19  
DMXL1  
CNTN4  
GALNT2  
ABCA1  
ZNF207  
FARP2  
CHD9  
NR2F2  
SLC22A3  
LPL  
RUFY3  
IGF2R  
HIF1A  
ATF6  
STAG1  
CUL1  
LINC02172  
PARP8

SRGAP1  
EEF1A2  
RNF24  
CACNB2  
DAB1  
MICU3  
CNN3  
JAG1  
NUMA1  
ENC1  
TOM1L1  
TACC2  
STARD13  
CREB3L2  
RBMS3-AS3  
ABCA6  
KMT2C  
APBB2  
PLA2R1  
STK39  
HSPA2  
PCCA  
RBMS3-AS2  
ANPEP  
EPB41L2  
GPRC5C  
BMPR1A  
RUNX2  
ARHGAP26  
REV3L  
EFHD2  
CKB  
TRAK1  
ABCA9  
LINC01197  
ITGA10  
STARD9  
PPM1L  
HEYL  
VPS13D  
WDFY3  
KLF12  
HIVEP2  
RUNX1  
VEGFA  
PDE8B

DNMBP  
NOTCH2  
PACSIN2  
38231.000  
CAPZB  
SETBP1  
CHD1  
ELL2  
DOCK11  
ADCY5  
ATP6V1B2  
PNISR  
MT3  
SGCE  
SLC2A12  
UGGT2  
DIAPH2  
SPATA6  
ITM2C  
EPS15  
ZEB2  
NHS  
SRSF5  
CHST11  
MAGED1  
ASAP2  
GUCY1A2  
LINC02256  
GRK3  
ANO3  
FAM13C  
PRRX1  
BGN  
ZBTB37  
PHLDA1  
NR4A2  
EPC2  
PIK3CD  
VSTM4  
LINC02147  
FAM49A  
ZNF644  
HIF1A-AS2  
NBL1  
CENPP  
ABCA10

TNS3  
TGFBR1  
THOC2  
NCK2  
FAM76B  
ECE1  
EDIL3  
FHL5  
SLC1A2  
ETV1  
ZEB1-AS1  
CCDC91  
CHN1  
PDGFA  
NFATC4  
MTSS1  
GABBR1  
CEBPB  
PCSK5  
LRP1  
ITGA11  
THSD7B  
SHISA6  
OSBPL9  
IMMP2L  
MYOF  
PFKFB3  
SLC9A9  
SSTR2  
LRIG1  
LINC00513  
CSPG4  
MAF  
GPER1  
CPQ  
PLP1  
FAM162B  
ATP1B1  
TMEM173  
UBE2E2  
AC019197.1  
TTC28  
MAP1B  
RERG  
KLHL23  
ARHGFE6

CALY  
LINC00894  
MLXIP  
HIP1  
SMURF1  
SESN3  
LRCH2  
UNC5C  
NHSL1  
ABL1  
COL27A1  
DLEU2  
SCAF8  
PHLDB3  
AC090825.1  
ARHGAP24  
ACTA2  
PBX1  
TIMP1  
KIRREL1  
PARVA  
CPED1  
DTX3  
C7orf50  
DCBLD1  
PALD1  
SLC22A23  
COL1A2  
PHLPP1  
STXBP4  
SNAP25  
MUC20-OT1  
HNMT  
TMEM51  
RASL12  
NEURL1B  
TMTC1  
MCAM  
MOB3B  
SPRED1  
AC008014.1  
CAST  
PLEKHG2  
RANBP3L  
CFH  
TRAF3IP2-AS1

C20orf194

TECR

ZNF618

DACH1

ROR1

CPPED1

WASHC4

ADK

FAM118A

AGAP1

LAMA4

TNFRSF21

ZNF331

GAB2

---
